# Supplementary material for: The Effects of Social Determinants of Health on Medication Utilization in Patients with Inflammatory Bowel Disease
Source: Research Square preprint supplement (doi:10.21203/rs.3.rs-6890611/v1), 2025-09-03
Supplement: Supplementary file 1 [file c2a4b74209fd27ca7dd7b882.docx]

**Tables**

Table 1a: The demographic characteristics of the medication utilization in Chron’s Disease study population.

|  | Anti-TNF | | | Anti-IL12/23 | | | Integrin | | | Small Molecule | | |
| --- | --- | --- | --- | --- | --- | --- | --- | --- | --- | --- | --- | --- |
|  | Yes (n=43) | No (n=157) | P-value | Yes (n=7) | No (n=193) | P-value | Yes (n=11) | No (n=189) | P-value | Yes (n=1) | No (n=199) | P-value |
| Age (mean, SD) | 55.8 (14.6) | 62.4 (13.9) | 0.01 | 49.9 (9.3) | 61.4 (14.3) | 0.04 | 61.5 (13.9) | 60.9 (14.3) | 0.89 | 64 (Na) | 61 (14.3) | 0.83 |
| Male | 15 (34.9) | 56 (35.6) | 0.9 | 2 (28.6) | 69 (35.7) | 0.69 | 3 (27.2) | 68 (36.0) | 0.56 | 1 (100) | 128 (64) | 0.46 |
| Race |  |  | 0.9 |  |  | 0.97 |  |  | 0.93 |  |  | 1.0 |
| White | 40 (93.0) | 139 (88.5) |  | 7 (100) | 172 (89.2) |  | 11 (100) | 168 (88.9) |  | 1 (100) | 178 (89) |  |
| Black | 3 (7.0) | 14 (8.9) |  | 0 | 17 (9.8) |  | 0 | 17 (9.0) |  | 0 | 17 (8.5) |  |
| Asian | 0 | 3 (3.3) |  | 0 | 1 |  | 0 | 1 (0.5) |  | 0 | 1 (0.5) |  |
| AI/AN | 0 | 1 (0.6) |  | 0 | 1 |  | 0 | 1 (0.5) |  | 0 | 1 (0.5) |  |
| Other | 0 | 1 (0.6) |  | 0 | 1 |  | 0 | 1 (0.5) |  | 0 | 1 (0.5) |  |
| Declined | 0 | 1 (0.6) |  | 0 | 1 |  | 0 | 1 (0.5) |  | 0 | 1 (0.5) |  |
| Hispanic | 3 (7.0) | 13 (8.3) | 0.78 | 1 (14.3) | 15 (8.7) | 0.53 | 2(18.2) | 14 (7.4) | 0.2 | 0 | 16 (8) | 0.77 |
| Disease extent |  |  | 0.72 |  |  | 0.56 |  |  | 0.87 |  | 41 (21) | 0.53 |
| L1 | 13 (30.2) | 38 (24.2) |  | 0 | 51 (26.4) |  | 4 (36.4) | 47 (24.9) |  | 0 | 51 (25.5) |  |
|  |  |  |  |  |  |  |  |  |  |  |  |  |
| L2 | 7 (16.3) | 26 (16.5) |  | 1 (14.3) | 32 (16.6) |  | 2 (18.2) | 31 (16.4) |  | 0 | 33 (17) |  |
| L3 | 16 (37.2) | 61 (38.9) |  | 4 (57.1) | 73 (37.8) |  | 4 (36.4) | 73 (38.6) |  | 1 (100) | 76 (48) |  |
| L4 | 1 (2.3) | 1 (0.6) |  | 0 | 2 (1) |  | 0 | 2 (1.0) |  | 0 | 2 (1) |  |
| Unknown | 6 (14.0) | 31 (19.7) |  | 2 (28.6) | 35 (37.8) |  | 1 (9.1) | 36 (19.0) |  | 0 |  |  |
| Perianal Disease | 6 (14.0) | 22 (14.0) | 0.99 | 0 | 28 (14.5) | 0.28 | 1 (9.1) | 27 (14.3) | 0.63 | 0 | 28 (14) | 0.69 |
| Disease Behavior |  |  | 0.34 |  |  | 0.96 |  |  | 0.5 |  |  | 0.54 |
| B1 | 16 (37.2) | 47 (30.0) |  | 2 (28.6) | 61 (31.6) |  | 4 (36.4) | 59 (31.2) |  | 1 (100) | 62 (31) |  |
| B2 | 15 (34.9) | 44 (28.0) |  | 2 (28.6) | 57 (29.5) |  | 5 (45.5) | 54 (28.6) |  | 0 | 59 (30) |  |
| B3 | 7 (16.3) | 30 (19.1) |  | 1 (14.3) | 36 (18.7) |  | 1 (9.1) | 36 (19.0) |  | 0 | 37 (19) |  |
| Unknown | 5 (11.6) | 36 (23.0) |  | 2 (28.6) | 39 (20.2) |  | 1 (9.1) | 40 (21.2) |  | 0 | 41 (20) |  |
| Alcohol | 10 (23.2) | 60 (38.2) | 0.19 | 0 | 70 (36.3) | 0.11 | 1 (9.1) | 69 (36.5) | 0.18 | 0 | 70 (35) | 0.63 |
| Tobacco |  |  | 0.5 |  |  | 0.66 |  |  | 0.39 |  |  | 0.83 |
| Current | 6 (14.0) | 12 (7.6) |  | 0 | 18 (9.3) |  | 0 | 18 (9.5) |  | 0 | 18 (9) |  |
| Former | 10 (23.3) | 49 (31.2) |  | 3 (42.9) | 56 (29.0) |  | 5 (45.5) | 54 (28.6) |  | 0 | 59 (30) |  |
| Never | 24 (55.8) | 83 (52.9) |  | 3 (42.9) | 104 (53.9) |  | 6 (54.5) | 101 (53.4) |  | 1 (100) | 106 (53) |  |
| Unknown | 3 (6.9) | 13 (8.3) |  | 1 (14.3) | 15 (7.8) |  | 0 | 16 (8.5) |  | 0 | 16 (8) |  |

Table 1b: The demographic characteristics of the medication utilization in Ulcerative colitis study population

|  | Anti-TNF | | | Anti-IL12/23 | | | Integrin | | | Small Molecule | | |
| --- | --- | --- | --- | --- | --- | --- | --- | --- | --- | --- | --- | --- |
|  | Yes (n=28) | No (n=92) | P-value | Yes=(n=7) | No (n=113) | P-value | Yes (n=6) | No (n=114) | P-value | Yes (n=1) | No (n=199) | P-value |
| Age (mean, SD) | 49.4 (17.2) | 65.4 (13.7) | <0.001 | 57 (15.6) | 62.1 (16.0) | 0.26 | 49.7 (16) | 62.3 (15.8) | 0.06 | 62 | 61.6 (16.1) | 0.98 |
| Male | 10 | 31 | 0.84 | 2 | 39 | 0.75 | 1 | 40 | 0.35 | 0 | 41 | 0.47 |
| Race |  |  | 0.48 |  |  | 0.62 |  |  | 0.001 |  |  | 0.99 |
| White | 24 | 78 |  | 6 | 96 |  | 5 | 97 |  | 1 | 101 |  |
| Black | 2 | 7 |  | 0 | 9 |  | 0 | 9 |  | 0 | 9 |  |
| Asian | 0 | 3 |  | 0 | 3 |  | 0 | 3 |  | 0 | 1 |  |
| Unknown | 1 | 0 |  | 0 | 1 |  | 1 | 0 |  | 0 | 4 |  |
| Other | 1 | 3 |  | 1 | 3 |  | 0 | 4 |  | 0 | 3 |  |
| Declined | 0 | 1 |  | 0 | 1 |  | 0 | 1 |  | 0 | 1 |  |
| Hispanic | 1 | 7 | 0.45 | 0 | 8 | 0.46 | 0 | 8 | 0.5 | 0 | 8 | 0.79 |
| Disease extent |  |  | 0.42 |  |  | 0.58 |  |  | 0.94 |  |  |  |
| E1 | 4 | 8 |  | 1 | 11 |  | 1 | 11 |  | 0 | 12 | 0.24 |
| E2 | 6 | 17 |  | 0 | 23 |  | 1 | 22 |  | 1 | 22 |  |
| E3 | 13 | 36 |  | 3 | 46 |  | 2 | 47 |  | 0 | 49 |  |
| Unknown | 5 | 31 |  | 3 | 33 |  | 2 | 2 |  | 0 | 36 |  |
| Disease Behavior |  |  | 0.56 |  |  | 0.96 |  |  | 0.95 |  |  | 0.99 |
| S0 | 0 | 3 |  | 0 | 3 |  | 0 | 3 |  | 0 | 3 |  |
| S1 | 0 | 5 |  | 0 | 5 |  | 0 | 5 |  | 0 | 5 |  |
| S2 | 0 | 1 |  | 0 | 1 |  | 0 | 1 |  | 0 | 1 |  |
| Unknown | 3 | 10 |  | 1 | 12 |  | 1 | 12 |  | 0 | 13 |  |
| Na | 25 | 73 |  | 6 | 92 |  | 5 | 93 |  | 1 | 97 |  |
| Alcohol | 8 | 28 | 0.8 | 1 | 35 | 0.25 | 3 | 33 | 0.45 | 0 | 36 | 0.016 |
| Tobacco |  |  | 0.28 |  |  | 0.15 |  |  | 0.09 |  |  | 0.028 |
| Current | 4 | 5 |  | 0 | 9 |  | 0 | 9 |  | 0 | 9 |  |
| Former | 7 | 22 |  | 3 | 26 |  | 4 | 25 |  | 0 | 29 |  |
| Never | 13 | 57 |  | 2 | 68 |  | 2 | 68 |  | 0 | 70 |  |
| Unknown | 4 | 8 |  | 2 | 10 |  | 0 | 12 |  | 1 | 11 |  |

Table 2a: Medication utilization patterns stratified by social determinants of health among patients with Crohn's disease

|  | Anti-TNF | | | Anti-IL12/23 | | | Integrin | | | Small Molecule | | |
| --- | --- | --- | --- | --- | --- | --- | --- | --- | --- | --- | --- | --- |
|  | Yes (n=43) | No (n=157) | P-value | Yes (n=7) | No (n=193) | P-value | Yes (n=11) | No (n=189) | P-value | Yes (n=1) | No (n=199) | P-value |
| Financial Strain |  |  | 0.88 |  |  | 0.27 |  |  | 0.85 |  |  | 0.99 |
| Not hard at all | 37 (86.0) | 134 (85.4) |  | 6 (85.7) | 165 (85.5) |  | 11 (100) | 160 (84.7) |  | 1 (100) | 170 (85) |  |
| Not very hard | 2 (4.6) | 10 (6.0) |  | 0 | 12 (6.2) |  | 0 | 12 (6.3) |  | 0 | 12 (6) |  |
| Somewhat hard | 1 (2.3) | 7 (4.5) |  | 0 | 8 (4.1) |  | 0 | 8 (4.2) |  | 0 | 8 (4) |  |
| Hard | 1 (2.3) | 1 (0.6) |  | 0 | 2 (1.0) |  | 0 | 2 (1.0) |  | 0 | 2 (1) |  |
| Very Hard | 1 (2.3) | 3 (1.9) |  | 1 (14.3) | 3 (1.6) |  | 0 | 4 (2.1) |  | 0 | 4 (2) |  |
| Patient refused | 1 (2.3) | 2 (1.2) |  | 0 | 3 (1.6) |  | 0 | 3 (1.6) |  | 0 | 3 (1.5) |  |
| Food insecurity |  |  | 0.26 |  |  | 0.35 |  |  | 0.89 |  |  | 0.99 |
| Never True | 40 (93.0) | 150 (95.5) |  | 6 (85.7) | 184 (95.3) |  | 11 (100) | 179 (94.7) |  | 1 (100) | 189 (95) |  |
| Sometimes True | 1 (2.3) | 5 (3.2) |  | 1 (14.3) | 5 (2.6) |  | 0 | 6 (3.2 |  | 0 | 6 (3) |  |
| Often True | 0 | 1 (0.6) |  | 0 | 1 (0.5) |  | 0 | 1 (0.5) |  | 0 | 1 (0.5) |  |
| Patient Refused | 2 (4.6) | 1 (0.6) |  | 0 | 3 (1.6) |  | 0 | 3 (1.6) |  | 0 | 3 (1.5) |  |
| PHQ (mean, SD) | 0.51 (0.93) | 0.49 (0.89) | 0.92 | 0.86 (0.9) | 0.49 (0.9) | 0.29 | 0.36 (0.67) | 0.51 (0.9) | 0.61 | 0 | 0.5 (0.89) | 0.58 |
| Lack of Transport | 0 | 1 (0.6) | 0.14 | 0 | 1 (0.5) | 0.93 | 0 | 1 (0.5) | 0.89 | 0 | 1 (0.5) | 0.99 |

Table 2b: Medication utilization patterns stratified by social determinants of health among patients with Ulcerative Colitis

|  | Anti-TNF | | | Anti-IL12/23 | | | Integrin | | | Small Molecule | | |
| --- | --- | --- | --- | --- | --- | --- | --- | --- | --- | --- | --- | --- |
|  | Yes (n=28) | No (n=92) | P-value | Yes (n=7) | No (n=113) | P-value | Yes (n=6) | No (n=114) | P-value | Yes (n=1) | No (n=199) | P-value |
| Financial Strain |  |  | 0.1 |  |  | 0.09 |  |  | 0.9 |  |  | 0.99 |
| Not hard at all | 24 | 79 |  | 6 | 97 |  | 6 | 97 |  | 1 | 102 |  |
| Not very hard | 2 | 10 |  | 0 | 12 |  | 0 | 12 |  | 0 | 12 |  |
| Somewhat hard | 2 | 0 |  | 1 | 1 |  | 0 | 2 |  | 0 | 2 |  |
| Hard | 0 | 0 |  | 0 | 0 |  | 0 | 0 |  | 0 | 2 |  |
| Very Hard | 0 | 1 |  | 0 | 1 |  | 0 | 1 |  | 0 | 1 |  |
| Patient refused | 0 | 2 |  | 0 | 2 |  | 0 | 2 |  | 0 | 0 |  |
| Food insecurity |  |  | 0.24 |  |  | 0.97 |  |  |  |  |  | 0.99 |
| Never True | 27 | 89 |  | 7 | 109 |  | 6 | 110 | 0.97 | 1 | 115 |  |
| Sometimes True | 0 | 1 |  | 0 | 1 |  | 0 | 1 |  | 0 | 1 |  |
| Often True | 1 | 0 |  | 0 | 1 |  | 0 | 1 |  | 0 | 1 |  |
| Patient Refused | 0 | 2 |  | 0 | 2 |  | 0 | 2 |  | 0 | 2 |  |
| PHQ (mean, SD) | 0.54 (0.9) | 0.34 (0.7) | 0.25 | 0.29 (0.49) | 0.39 (0.79) | 0.72 | 0.83 (0.41) | 0.36 (0.79) | 0.15 |  |  |  |
| Lack of Transport | 1 | 1 | 0.58 | 0 | 2 | 0.91 | 1 | 1 | 0.01 | 0 | 2 | 0.99 |
